# Supplementary material for: Dys-R Questionnaire: A Novel Screening Tool for Dysbiosis Linked to Impaired Gut Microbiota Richness
Source: MDPI journal article supplement (doi:10.3390/nu15194261), 2023-10-05
Supplement: s1 [file s1]

Supplementary Materials

# Dys-R Questionnaire: A Novel Screening Tool for Dysbiosis Linked to Impaired Gut Microbiota Richness

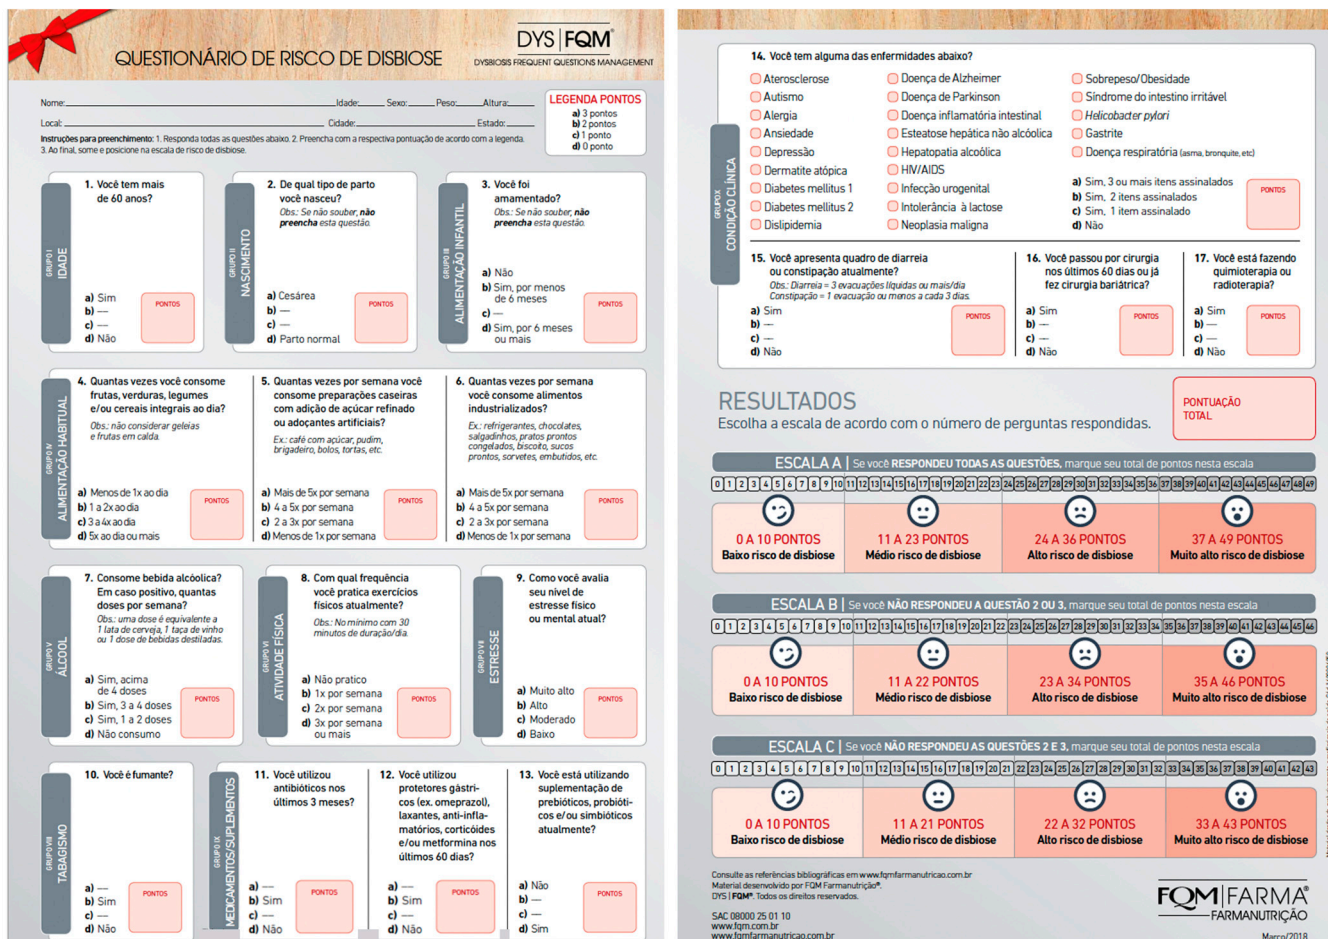

**QUESTIONÁRIO DE RISCO DE DISBIOSE** DYS/FQM  
DYSBIOSIS FREQUENT QUESTIONS MANAGEMENT

Nome: \_\_\_\_\_ Idade: \_\_\_\_\_ Sexo: \_\_\_\_\_ Peso: \_\_\_\_\_ Altura: \_\_\_\_\_  
Local: \_\_\_\_\_ Cidade: \_\_\_\_\_ Estado: \_\_\_\_\_

**LEGENDA PONTOS**  
a) 3 pontos  
b) 2 pontos  
c) 1 ponto  
d) 0 ponto

**INSTRUÇÕES para preenchimento:** 1. Responda todas as questões abaixo. 2. Preencha com a respectiva pontuação de acordo com a legenda. 3. Ao final, some e posicione na escala de risco de disbiose.

**GRUPO I: IDADE**  
1. Você tem mais de 60 anos?  
a) Sim **PONTOS**  
b) —  
c) —  
d) Não

**GRUPO II: NASCIMENTO**  
2. De qual tipo de parto você nasceu?  
Obs: Se não souber, não preencha esta questão.  
a) Cesárea **PONTOS**  
b) —  
c) —  
d) Parto normal

**GRUPO III: ALIMENTAÇÃO INFANTIL**  
3. Você foi amamentado?  
Obs: Se não souber, não preencha esta questão.  
a) Não **PONTOS**  
b) Sim, por menos de 6 meses  
c) —  
d) Sim, por 6 meses ou mais

**GRUPO IV: ALIMENTAÇÃO HABITUAL**  
4. Quantas vezes você consome frutas, verduras, legumes e/ou cereais integrais ao dia?  
Obs: não considerar geleias e frutas em calda.  
a) Menos de 1x ao dia **PONTOS**  
b) 1 a 2x ao dia  
c) 3 a 4x ao dia  
d) 5x ao dia ou mais

5. Quantas vezes por semana você consome preparações caseiras com adição de açúcar refinado ou adoçantes artificiais?  
Ex: café com açúcar, pudim, brigadeiro, bolos, tortas, etc.  
a) Mais de 5x por semana **PONTOS**  
b) 4 a 5x por semana  
c) 2 a 3x por semana  
d) Menos de 1x por semana

6. Quantas vezes por semana você consome alimentos industrializados?  
Ex: refrigerantes, chocolates, salgadinhos, pratos prontos congelados, biscoitos, sucos prontos, sorvetes, embutidos, etc.  
a) Mais de 5x por semana **PONTOS**  
b) 4 a 5x por semana  
c) 2 a 3x por semana  
d) Menos de 1x por semana

**GRUPO V: ALCÓOL**  
7. Consome bebida alcoólica? Em caso positivo, quantas doses por semana?  
Obs: uma dose é equivalente a 1 lata de cerveja, 1 taça de vinho ou 1 dose de bebidas destiladas.  
a) Sim, acima de 4 doses **PONTOS**  
b) Sim, 3 a 4 doses  
c) Sim, 1 a 2 doses  
d) Não consumo

**GRUPO VI: ATIVIDADE FÍSICA**  
8. Com qual frequência você pratica exercícios físicos atualmente?  
Obs: No mínimo com 30 minutos de duração diária.  
a) Não pratico **PONTOS**  
b) 1x por semana  
c) 2x por semana  
d) 3x por semana ou mais

**GRUPO VII: ESTRESSE**  
9. Como você avalia seu nível de estresse físico ou mental atual?  
a) Muito alto **PONTOS**  
b) Alto  
c) Moderado  
d) Baixo

**GRUPO VIII: TABAGISMO**  
10. Você é fumante?  
a) — **PONTOS**  
b) Sim  
c) —  
d) Não

**GRUPO IX: MEDICAMENTOS/SUPLEMENTOS**  
11. Você utilizou antibióticos nos últimos 3 meses?  
a) — **PONTOS**  
b) Sim  
c) —  
d) Não

12. Você utilizou protetores gástricos (ex. omeprazol), laxantes, anti-inflamatórios, corticoides e/ou metformina nos últimos 60 dias?  
a) — **PONTOS**  
b) Sim  
c) —  
d) Não

13. Você está utilizando suplementação de probióticos, probióticos e/ou simbióticos atualmente?  
a) Não **PONTOS**  
b) —  
c) —  
d) Sim

**CONDICÃO CLÍNICA**  
14. Você tem alguma das enfermidades abaixo?  
☐ Aterosclerose ☐ Doença de Alzheimer ☐ Sobrepeso/Obesidade  
☐ Autismo ☐ Doença de Parkinson ☐ Síndrome do intestino irritável  
☐ Alergia ☐ Doença inflamatória intestinal ☐ *Helicobacter pylori*  
☐ Ansiedade ☐ Esteatose hepática não alcoólica ☐ Gastrite  
☐ Depressão ☐ Hepatopatia alcoólica ☐ Doença respiratória (asma, bronquite, etc.)  
☐ Dermite atópica ☐ HIV/AIDS  
☐ Diabetes mellitus 1 ☐ Infecção urogenital  
☐ Diabetes mellitus 2 ☐ Intolerância à lactose  
☐ Dislipidemia ☐ Neoplasia maligna  
a) Sim, 3 ou mais itens assinalados **PONTOS**  
b) Sim, 2 itens assinalados  
c) Sim, 1 item assinalado  
d) Não

15. Você apresenta quadro de diarreia ou constipação atualmente?  
Obs: Diarreia = 3 evacuações líquidas ou mais/dia  
Constipação = 1 evacuação ou menos a cada 3 dias.  
a) Sim **PONTOS**  
b) —  
c) —  
d) Não

16. Você passou por cirurgia nos últimos 60 dias ou já fez cirurgia bariátrica?  
a) Sim **PONTOS**  
b) —  
c) —  
d) Não

17. Você está fazendo quimioterapia ou radioterapia?  
a) Sim **PONTOS**  
b) —  
c) —  
d) Não

**RESULTADOS**  
Escolha a escala de acordo com o número de perguntas respondidas.

**ESCALA A | Se você RESPONDEU TODAS AS QUESTÕES, marque seu total de pontos nesta escala**  
0 1 2 3 4 5 6 7 8 9 10 11 12 13 14 15 16 17 18 19 20 21 22 23 24 25 26 27 28 29 30 31 32 33 34 35 36 37 38 39 40 41 42 43 44 45 46 47 48 49  
0 A 10 PONTOS Baixo risco de disbiose  
11 A 23 PONTOS Médio risco de disbiose  
24 A 36 PONTOS Alto risco de disbiose  
37 A 49 PONTOS Muito alto risco de disbiose

**ESCALA B | Se você NÃO RESPONDEU A QUESTÃO 2 OU 3, marque seu total de pontos nesta escala**  
0 1 2 3 4 5 6 7 8 9 10 11 12 13 14 15 16 17 18 19 20 21 22 23 24 25 26 27 28 29 30 31 32 33 34 35 36 37 38 39 40 41 42 43 44 45 46 47 48 49  
0 A 10 PONTOS Baixo risco de disbiose  
11 A 22 PONTOS Médio risco de disbiose  
23 A 34 PONTOS Alto risco de disbiose  
35 A 46 PONTOS Muito alto risco de disbiose

**ESCALA C | Se você NÃO RESPONDEU AS QUESTÕES 2 E 3, marque seu total de pontos nesta escala**  
0 1 2 3 4 5 6 7 8 9 10 11 12 13 14 15 16 17 18 19 20 21 22 23 24 25 26 27 28 29 30 31 32 33 34 35 36 37 38 39 40 41 42 43 44 45 46 47 48 49  
0 A 10 PONTOS Baixo risco de disbiose  
11 A 21 PONTOS Médio risco de disbiose  
22 A 32 PONTOS Alto risco de disbiose  
33 A 43 PONTOS Muito alto risco de disbiose

Consulte as referências bibliográficas em [www.fqmfarmnutricao.com.br](http://www.fqmfarmnutricao.com.br)  
Material desenvolvido por FQM Farmnutrição®  
DYS/FQM®. Todos os direitos reservados.  
SAC 08000 25 01 10  
[www.fqm.com.br](http://www.fqm.com.br)  
[www.fqmfarmnutricao.com.br](http://www.fqmfarmnutricao.com.br)

**FQM FARMNUTRIÇÃO**  
MARÇO/2018

**Supplementary Figure S1.** Questionnaire registered in Brazil at the National Institute of Industrial Property (INPI) by the Far-moquímica® Laboratory called Dysbiosis Frequent Questions Management (DYS/FQM)

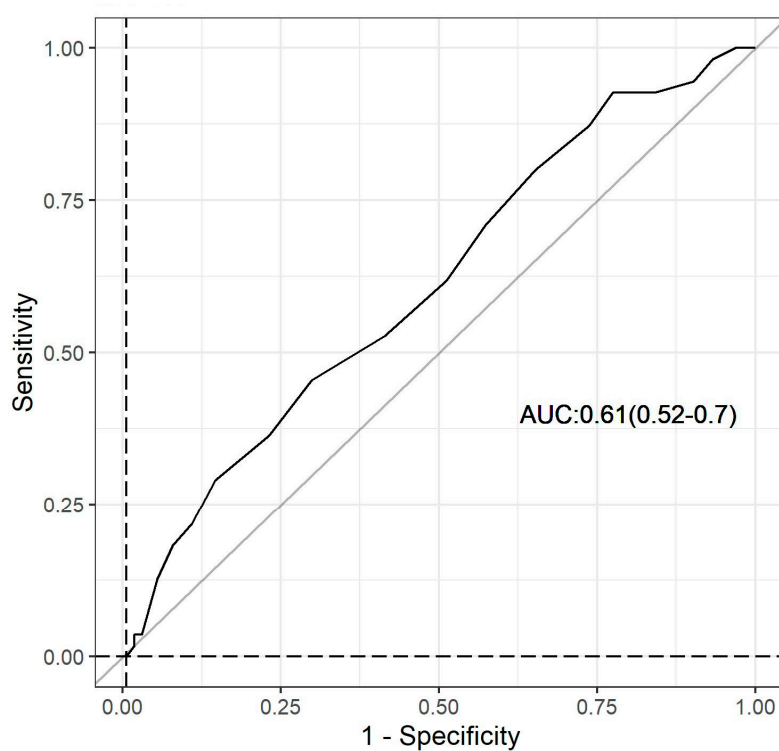

**Supplementary Figure S2.** Receiver Operating Characteristic (ROC) curve of the Dysbiosis Frequent Questions Management (DYS/FQM)
